# Supplementary material for: Ultraviolet Spectrophotometry of Lignin Revisited: Exploring Solvents with Low Harmfulness, Lignin Purity, Hansen Solubility Parameter, and Determination of Phenolic Hydroxyl Groups
Source: PubMed Central journal article supplement (PMC9773929; doi:10.1021/acsomega.2c04982), 2022-12-05
Supplement: ao2c04982_si_001.pdf [file ao2c04982_si_001.pdf]

*Supporting Information for*

**UV spectrophotometry of lignin revisited: Exploring solvents with low harmfulness, lignin purity, Hansen Solubility Parameter, and determination of phenolic hydroxyl groups**

Jost Ruwoldt<sup>a\*</sup>, Mihaela Tanase-Opedal<sup>a</sup>, Kristin Syverud<sup>a</sup>

<sup>a</sup>RISE PFI AS, Høgskoleringen 6B, 7491 Trondheim, Norway

\*Corresponding author email: [jostru.chemeng@gmail.com](mailto:jostru.chemeng@gmail.com)

Table S1. Natural pH of 5 wt.% lignin dispersion in distilled water

| <b>Alias</b> | <b>Lignin type</b>         | <b>pH</b> |
|--------------|----------------------------|-----------|
| ASL1         | Arkansas/straw Soda Lignin | 3.6       |
| ASL2         | Arkansas/straw Soda Lignin | 3.7       |
| ASL3         | Arkansas/straw Soda Lignin | 6.7       |
| SKL1         | Softwood Kraft Lignin      | 2.4       |
| SKL2         | Softwood Kraft Lignin      | 4.5       |
| SKL3         | Softwood Kraft Lignin      | 3.2       |
| SSL1         | Spruce Soda Lignin         | 4.3       |
| SSL2         | Spruce Soda Lignin         | 3.1       |
| SSL3         | Spruce Soda Lignin         | 3.7       |
| SOL          | Spruce Organosolv Lignin   | 3.4       |
| AL           | Alkali Lignin              | 8.9       |

Table S2. Binary solubility data of the tested lignin samples

| <b>Solvent</b>                | <b>SKL1</b> | <b>SSL1</b> | <b>ASL1</b> | <b>SOL</b> |
|-------------------------------|-------------|-------------|-------------|------------|
| Water                         | 0           | 0           | 0           | 0          |
| Ethanol                       | 0           | 0           | 0           | 0          |
| 1-Propanol                    | 0           | 0           | 0           | 0          |
| 2-Propanol                    | 0           | 0           | 0           | 0          |
| 1-Hexanol                     | 0           | 0           | 0           | 0          |
| Ethylene glycol               | 1           | 1           | 1           | 1          |
| 1,4 Dioxane                   | 0           | 0           | 1           | 1          |
| PEG-400                       | 0           | 0           | 0           | 1          |
| 2-Methoxyethanol (Cellosolve) | 1           | 1           | 1           | 1          |
| Acetone                       | 0           | 0           | 0           | 0          |
| 2-Butanone (MEK)              | 0           | 0           | 0           | 0          |
| Acetic acid (glacial)         | 0           | 0           | 0           | 0          |
| Diethyl ether                 | 0           | 0           | 0           | 0          |
| Metyl tert-butyl ether        | 0           | 0           | 0           | 0          |
| n-Butyl acetate               | 0           | 0           | 0           | 0          |
| Propylene carbonate           | 0           | 0           | 0           | 0          |
| Propylene glycol              | 0           | 0           | 0           | 0          |
| Dichloromethane (DCM)         | 0           | 0           | 0           | 0          |
| Chloroform                    | 0           | 0           | 0           | 0          |
| Tetrahydrofuran (THF)         | 0           | 0           | 0           | 1          |
| Pyridine                      | 1           | 1           | 1           | 1          |
| Toluene                       | 0           | 0           | 0           | 0          |
| Cyclohexane                   | 0           | 0           | 0           | 0          |
| n-Heptane                     | 0           | 0           | 0           | 0          |
| Acetonitrile                  | 0           | 0           | 0           | 0          |
| Dimethyl formamide (DMF)      | 1           | 1           | 1           | 1          |
| Dimethyl Sulfoxide (DMSO)     | 1           | 1           | 1           | 1          |

Table S3. Hansen Solubility Parameters of various solvents employed in this study.

| Solvent                       | Dispersion<br>$\delta_d$<br>$MPa^{0.5}$ | Polar interactions<br>$\delta_p$<br>$MPa^{0.5}$ | Hydrogen bonding<br>$\delta_h$<br>$MPa^{0.5}$ |
|-------------------------------|-----------------------------------------|-------------------------------------------------|-----------------------------------------------|
| Water                         | 15.5                                    | 16.0                                            | 42.3                                          |
| Ethanol                       | 15.8                                    | 8.8                                             | 19.4                                          |
| 1-Propanol                    | 16                                      | 6.8                                             | 17.4                                          |
| 2-Propanol                    | 15.8                                    | 6.1                                             | 16.4                                          |
| 1-Hexanol                     | 15.9                                    | 5.8                                             | 12.5                                          |
| Ethylene Glycol               | 17                                      | 11                                              | 26                                            |
| 1,4-Dioxane                   | 17.5                                    | 1.8                                             | 9                                             |
| PEG -400                      | 14.6                                    | 7.5                                             | 9.4                                           |
| 2-Methoxyethanol (Cellosolve) | 16.2                                    | 9.2                                             | 16.4                                          |
| Acetone                       | 15.5                                    | 10.4                                            | 7                                             |
| 2-Butanone (MEK)              | 16                                      | 9                                               | 5.1                                           |
| Acetic acid (glacial)         | 14.5                                    | 8.0                                             | 13.5                                          |
| Diethyl Ether                 | 14.5                                    | 2.9                                             | 4.6                                           |
| Metyl tert-Butylether         | 14.8                                    | 4.3                                             | 5                                             |
| Propylene Carbonate           | 20                                      | 18                                              | 4.1                                           |
| Dichloromethane (DCM)         | 18.2                                    | 6.3                                             | 6.1                                           |
| Chloroform                    | 17.8                                    | 3.1                                             | 5.7                                           |
| Tetrahydrofuran (THF)         | 16.8                                    | 5.7                                             | 8                                             |
| Pyridin                       | 19.0                                    | 8.8                                             | 5.9                                           |
| Toluene                       | 18                                      | 1.4                                             | 2                                             |
| Cyclohexane                   | 16.8                                    | 0                                               | 0.2                                           |
| n-Heptane                     | 15.3                                    | 0                                               | 0                                             |
| Acetonitrile                  | 15.3                                    | 18                                              | 6.1                                           |
| N,N-Dimethyl Formamide (DMF)  | 17.4                                    | 13.7                                            | 11.3                                          |
| Dimethyl Sulfoxide (DMSO)     | 18.4                                    | 16.4                                            | 10.2                                          |
